# Supplementary material
Source: PubMed Central journal article supplement (PMC5388552)
Supplement: supp_fj.201600828R_Supplemental_Figure1.pdf [file supp_fj.201600828R_Supplemental_Figure1.pdf]

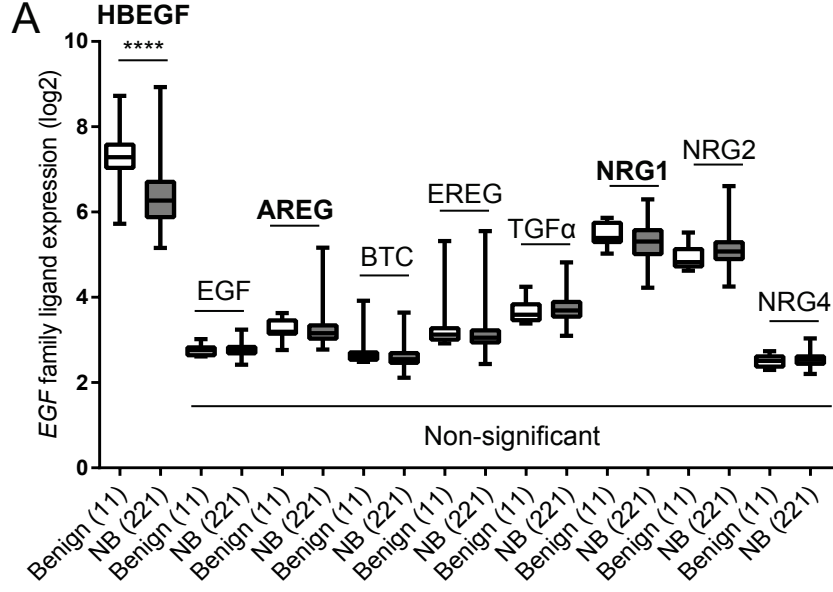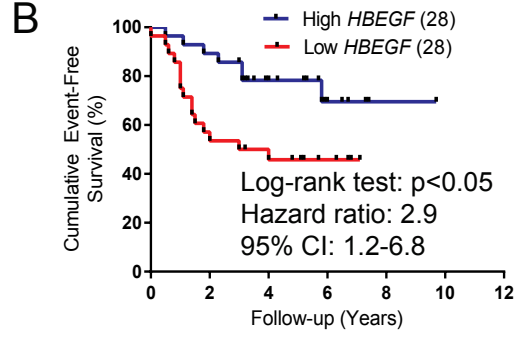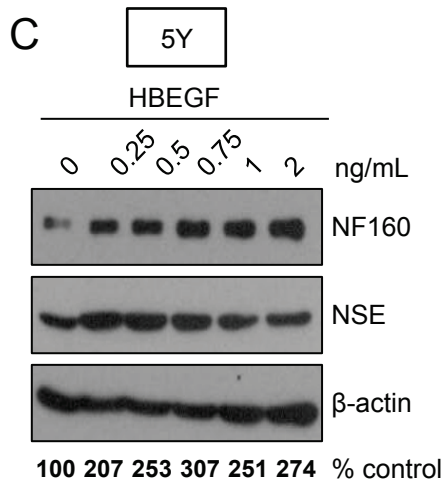

**Supplemental Figure 1: HBEGF expression is decreased in neuroblastoma and high expression is associated with improved prognosis and differentiation.** Microarray analysis for A) EGF family ligand expression in benign neuroblastic tumors (ganglioneuroma/ganglioneuroblastoma) or neuroblastoma (NB) tumors in the microarray meta-dataset. Kruskal-Wallis:  $p < 0.0001$ , Mann-Whitney for intergroup comparisons: \*\*\*\* $p < 0.0001$ . Bold text indicates heparan sulfate-binding ligands. B) event-free survival in NB with low (bottom 50%; red) and high (top 50%; blue) *HBEGF* expression in the NB Prognosis dataset. C) Western blot for differentiation markers in 5Y following 72 hour HBEGF treatment.
