# Supplementary material
Source: PubMed Central journal article supplement (PMC5388552)
Supplement: supp_fj.201600828R_Supplemental_Figure2.pdf [file supp_fj.201600828R_Supplemental_Figure2.pdf]

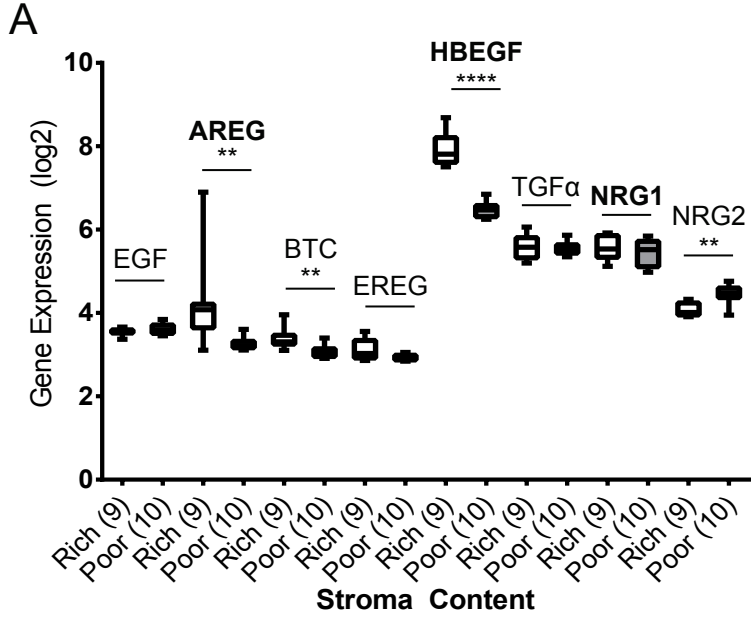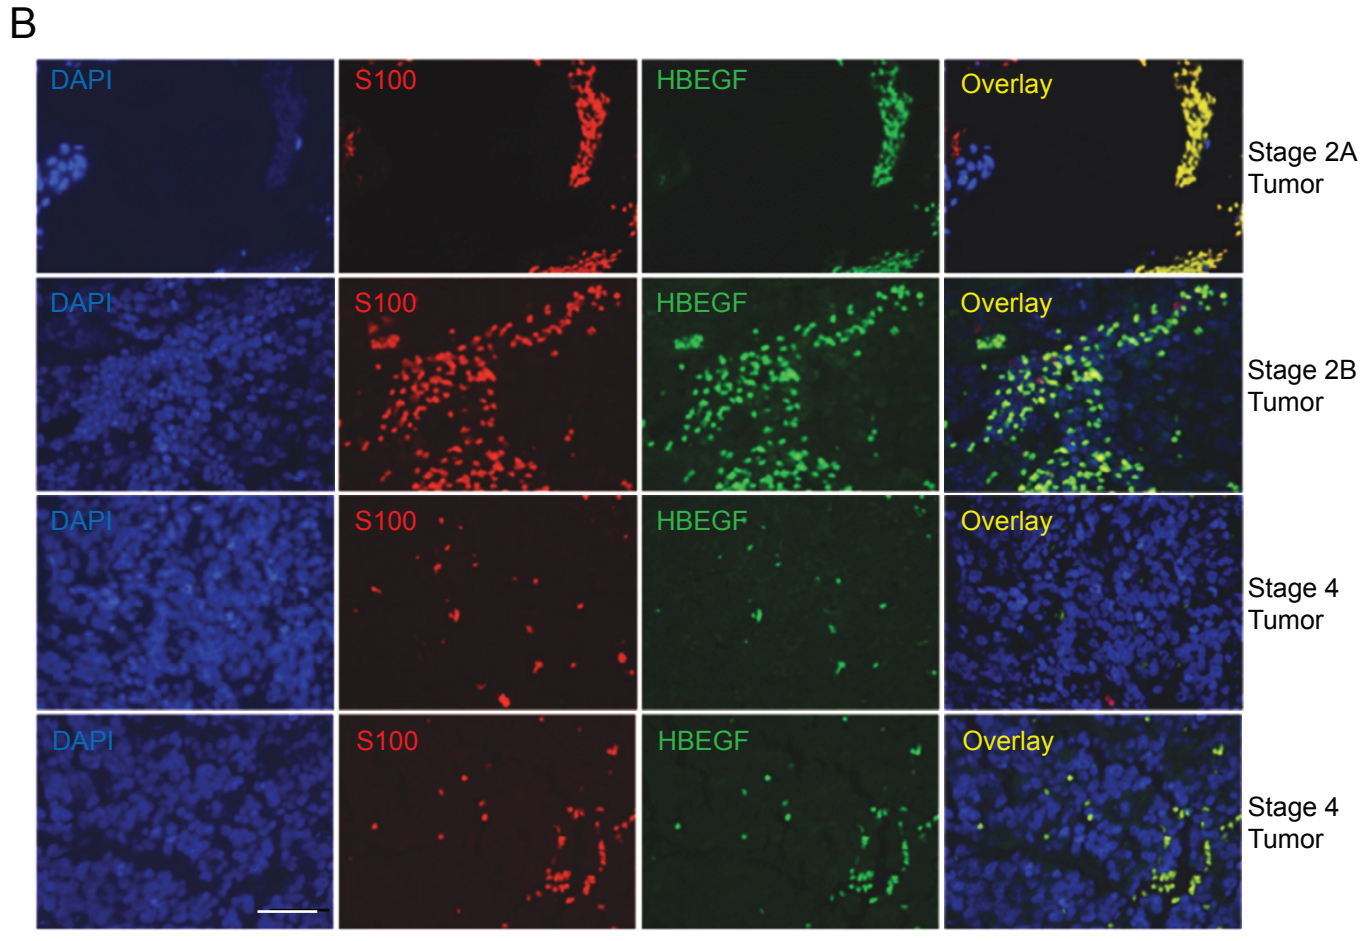

**Supplemental Figure 2: HBEGF expression is localized to the stroma.** A) EGF family ligand expression in neuroblastic tumors based on stroma content in a microarray dataset (GSE7529). Kruskal-Wallis:  $p < 0.0001$ , Mann-Whitney for intergroup comparisons: \*\* $p < 0.01$ , \*\*\*\* $p < 0.0001$ . Bold text indicates heparan sulfate-binding ligands. B) Immunofluorescence in neuroblastoma specimens using HBEGF (green) and S100 Schwannian stroma (red) antibodies. DAPI nuclear stain in blue. 40X images, scale bar = 50 $\mu$ M.
