# Supplementary material
Source: PubMed Central journal article supplement (PMC5388552)
Supplement: supp_fj.201600828R_Supplemental_Figure3.pdf [file supp_fj.201600828R_Supplemental_Figure3.pdf]

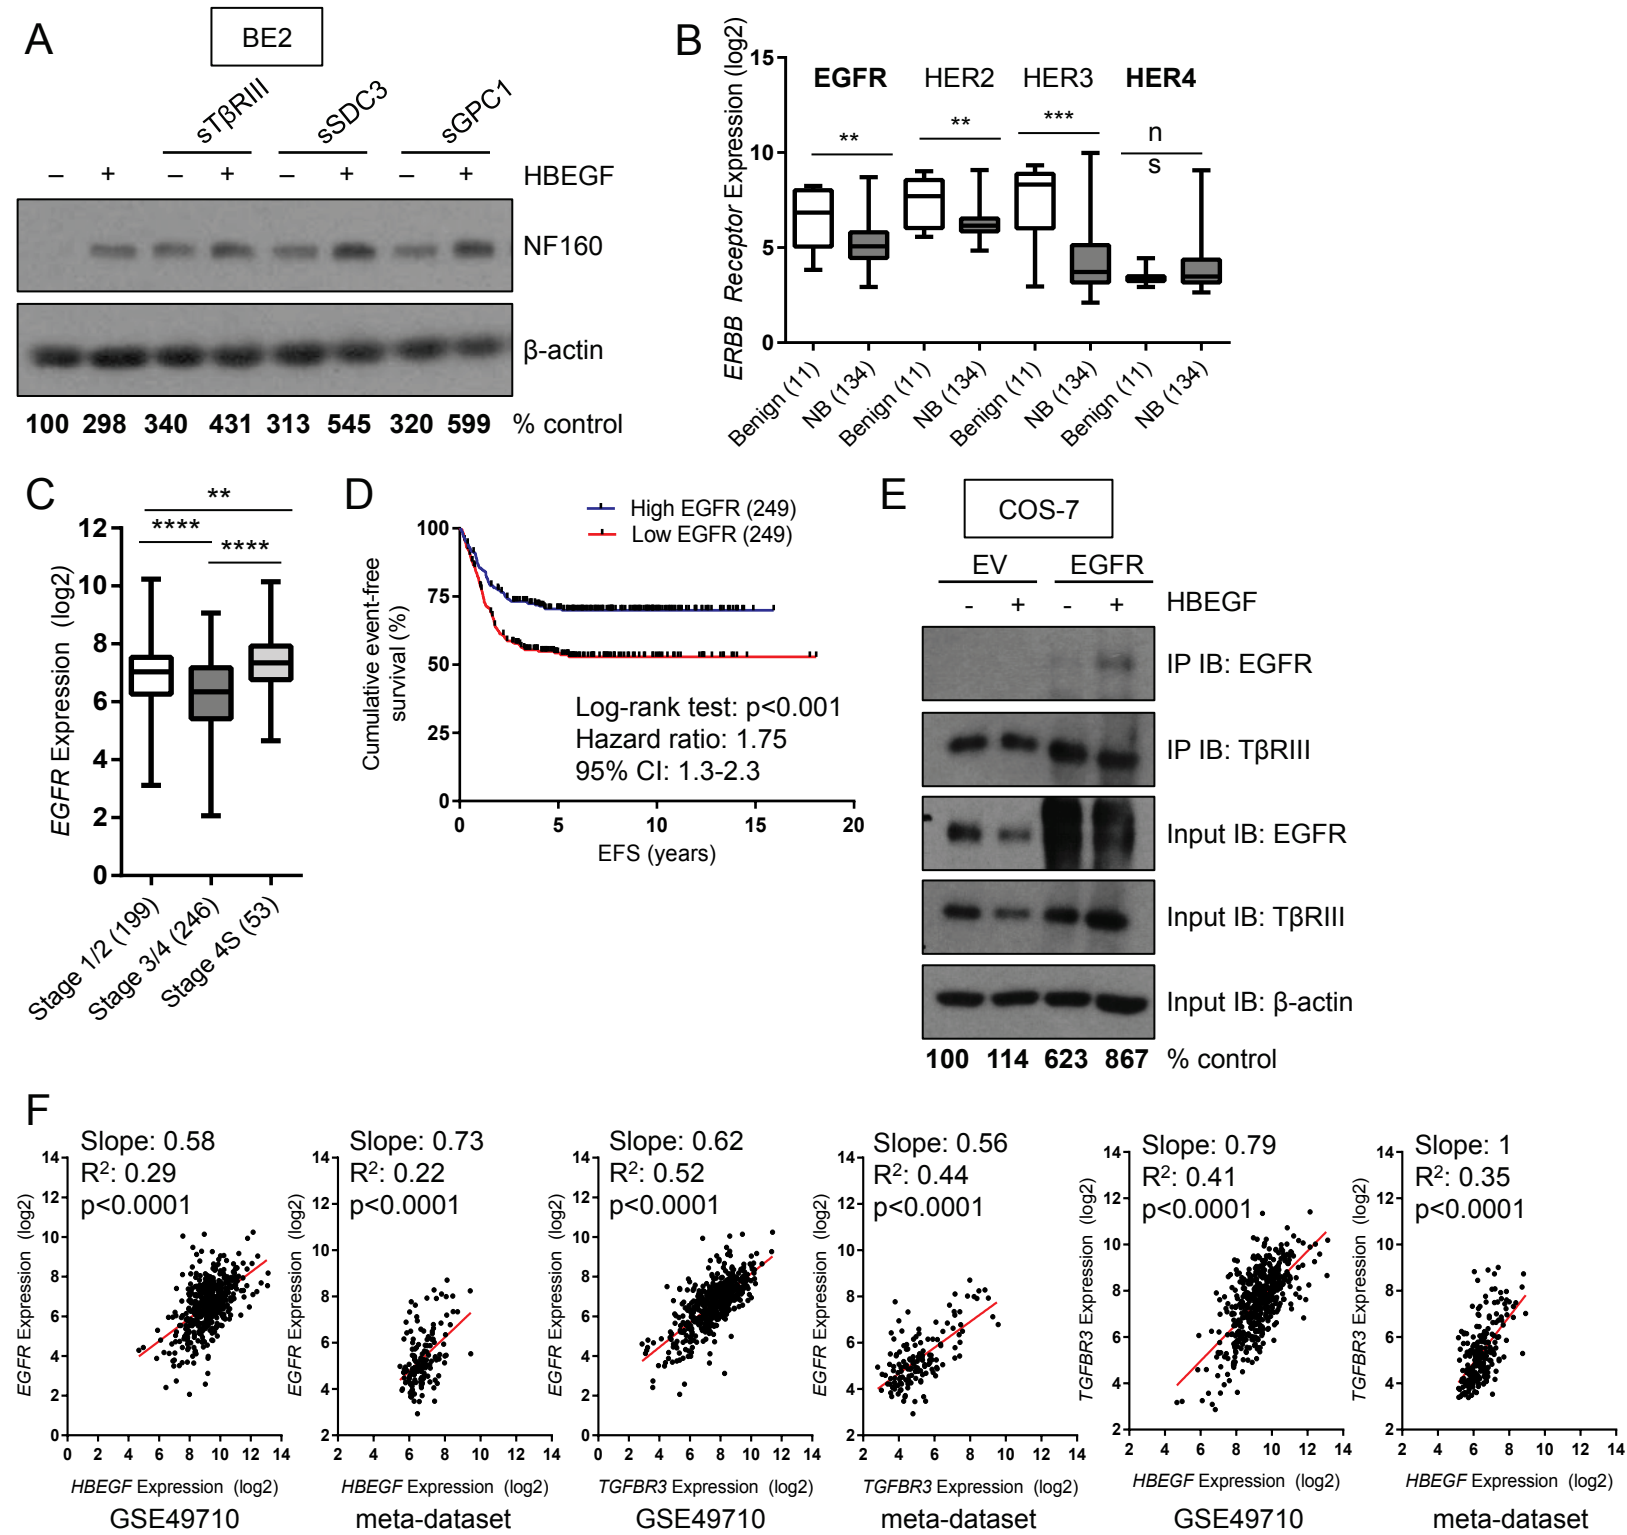

**Supplemental Figure 3: HSPGs, EGFR, and HBEGF associate to promote neuroblast differentiation.** A) Western blot for differentiation markers following treatment with 10ng/ml sTβRIII or 100ng/ml sSDC3 or sGPC1 in the presence or absence of 0.5ng/mL HBEGF. Densitometry for NF160 normalized to β-actin is shown as the percentage of control. B) ERBB receptor expression in benign neuroblastic tumors (ganglioneuroma/ganglioneuroblastoma) or neuroblastoma (NB) tumors in the microarray meta-dataset (only GSE12460, GSE16237, GSE13141 were included in analysis due to unshared probe for EGFR), Kruskal-Wallis:  $p < 0.0001$ , Mann-Whitney for intergroup comparisons: \*\* $p < 0.01$ , \*\*\* $p < 0.001$ . Bold text indicates HBEGF receptor. C) EGFR expression in neuroblastoma patients by stage. Kruskal-Wallis:  $p < 0.0001$ , Mann-Whitney for intergroup comparisons: \*\* $p < 0.01$ , \*\*\*\* $p < 0.0001$ . D) Event-free survival in NB with low (bottom 50%; red) and high (top 50%; blue) *EGFR* expression in the GSE49710 dataset. E) Co-immunoprecipitation in COS-7 following 72 hour HBEGF treatment with additional 5 minute HBEGF treatment prior to lysis. F) Linear regression analyses using the indicated datasets. Box plots are presented as median (horizontal bars) and interquartile range (boxes).
