# Supplementary material
Source: PubMed Central journal article supplement (PMC5388552)
Supplement: supp_fj.201600828R_Supplemental_Figure4.pdf [file supp_fj.201600828R_Supplemental_Figure4.pdf]

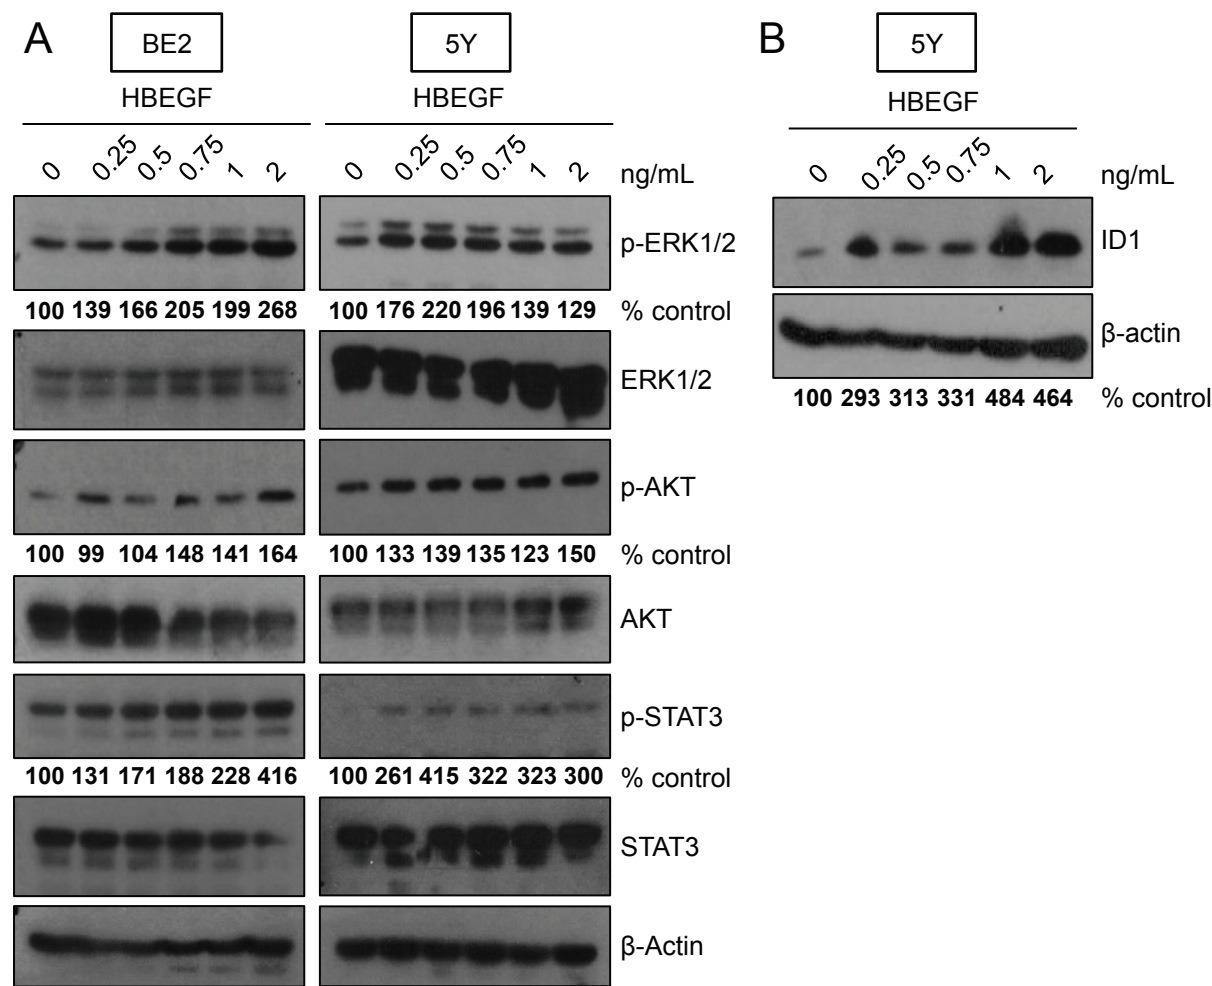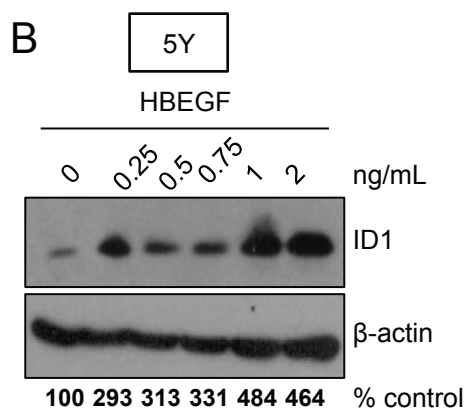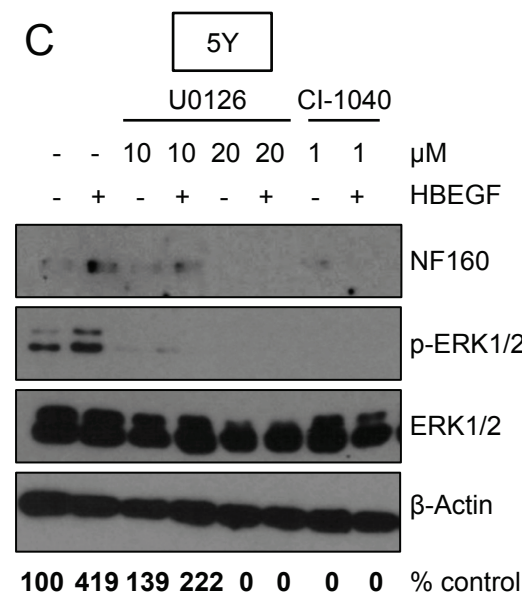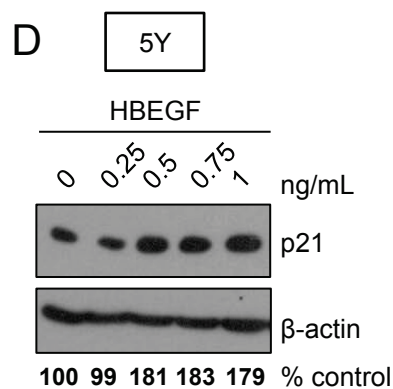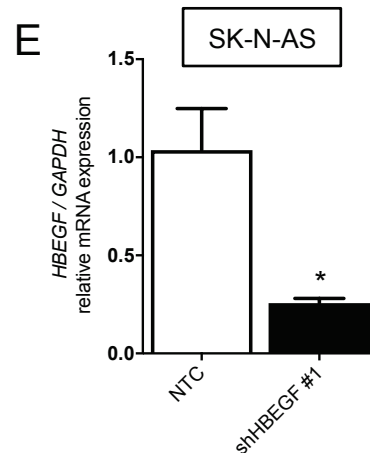

**Supplemental Figure 4: HBEGF enhances differentiation via ERK and STAT3 signaling leading to increased ID1.** A) Western blot for signaling markers in BE2 and 5Y treated 72 hours with a dosecourse of HBEGF. Densitometry for phosphorylated protein normalized to total protein is shown as the percentage of control. B) Western blot for ID1 in 5Y after 72 hour treatment with a dosecourse of HBEGF. Densitometry for ID1 normalized to β-actin is shown as the percentage of control. C) Western blot for differentiation and signaling markers in 5Y following 24 hour treatment with U0126 or CI-1040 and 1ng/mL HBEGF. Densitometry for NF160 normalized to β-actin is shown as the percentage of control. D) Western blot for p21 after 72 hours of HBEGF treatment in 5Y. Densitometry for p21 normalized to β-actin is shown as the percentage of control. E) Relative HBEGF mRNA expression in stable SK-N-AS cells expressing either a non-targeting control (NTC) shRNA or shHBEGF #1 shRNA normalized to GAPDH expression. Two-tailed Student's *t*-test: \**p*<0.05.
